# Supplementary material
Source: publisher figshare collection journal article supplement (https://tandf.figshare.com/ndownloader/files/17722715)
Supplement: Supplementary file 1 [file 17722715]

**Supplementary Table 1.** Hazard ratios (HR) of main risk factors associated with mCRC and comparing with transrenal DNA.

|                                    |         | HR   |
|------------------------------------|---------|------|
| <b>Gender</b>                      | Male    | 1    |
|                                    | Female  | 1.08 |
| <b>Number of metastatic sites</b>  | 1       | 1    |
|                                    | 2       | 1.13 |
|                                    | >2      | 1.57 |
| <b>ECOG performance status</b>     | 0       | 1    |
|                                    | 1       | 1.05 |
|                                    | Unknown | 0.93 |
| <b>Transrenal DNA levels</b>       | Low     | 1    |
|                                    | High    | 2.47 |
| <b>Transrenal DNA KRAS profile</b> | KRAS -  | 1    |
|                                    | KRAS +  | 1.22 |
